# Supplementary material for: Long-Term Consumption of Purified Water Altered Amino Acid, Fatty Acid and Energy Metabolism in Livers of Rats
Source: MDPI journal article supplement (doi:10.3390/metabo14050289), 2024-05-19
Supplement: s1 [file s1]

## **Supplementary data**

### **Long-term consumption of purified water altered amino acid, fatty acid and energy metabolism in liver of rats**

WANG jia<sup>1</sup>, QIU zhiqun<sup>2</sup>, ZENG hui<sup>2</sup>, TAN yao<sup>2</sup>, HUANG yujing<sup>2</sup>, LUO jiaohua<sup>2\*</sup>, SHU weiqun<sup>2\*</sup>

<sup>1</sup>Department of Medical English, College of Basic Medicine, Army Medical University (Third Military Medical University), Chongqing, 400038, China

<sup>2</sup>Department of Environmental Hygiene, College of Preventive Medicine, Army Medical University (Third Military Medical University), Chongqing, 400038, China

**\*Correspondence: [ljh978@tmmu.edu.cn](mailto:ljh978@tmmu.edu.cn); Telephone: +86-23-68771559.  
[weiqunshu@tmmu.edu.cn](mailto:weiqunshu@tmmu.edu.cn); Telephone: +86-23-68771559.**

## **Table of contents**

1. Supplementary materials and methods
  - 1.1 Sample preparation and derivatization protocols
  - 1.2 Instrument settings of the UPLC-MS/MS analysis
2. Supplementary Tables
  - 2.1 Supplementary Table S1. Composition of the feed
  - 2.2 Supplementary Table S2. Biochemical parameters in serum
  - 2.3 Supplementary Table S3. Biochemical parameters in urine

## 1. Supplementary materials and methods

### 1.1 Sample preparation and derivatization protocols

Each tissue sample (~10mg) that was harvested and stored in an Eppendorf Safelock microcentrifuge tube was mixed with 10 pre-chilled zirconium oxide beads and 20 $\mu$ L of deionized water. The sample was homogenated for 3 minutes and 120 $\mu$ L of Methanol containing internal standard was added to extract the metabolites. The sample was homogenated for another 3 minutes and then centrifuged at 18000g for 20 minutes. Then the supernatant was transferred to a 96-well plate. The following procedures were performed on an Eppendorf epMotion Workstation (Eppendorf Inc., Hamburg, Germany). 20 $\mu$ L of freshly prepared derivative reagents was added to each well. The plate was sealed and the derivatization was carried out at 30°C for 60 min. After derivatization, the sample was evaporated for 2h. 330 $\mu$ L of ice-cold 50% methanol solution was added to reconstitute the sample. Then the plate was stored at -20°C for 20 minutes and followed by 4000g centrifugation at 4°C for 30 minutes. 135 $\mu$ L of supernatant was transferred to a new 96-well plate with 10 $\mu$ L internal standards in each well. Serial dilutions of derivatized stock standards were added to the left wells. Finally the plate was sealed for LC-MS analysis.

### 1.2 Instrument settings of the UPLC-MS/MS analysis

An ultra-performance liquid chromatography coupled to tandem mass spectrometry (UPLC-MS/MS) system (ACQUITY UPLC-Xevo TQ-S, Waters Corp., Milford, MA, USA) was used to quantitate all targeted metabolites in this project. The optimized instrument settings are briefly described below. The instrument performance optimization and routine maintenance were performed every week.

| UPLC-MS/MS instrument settings |                                                                                                                                                         |
|--------------------------------|---------------------------------------------------------------------------------------------------------------------------------------------------------|
| UPLC                           |                                                                                                                                                         |
| Column                         | ACQUITY UPLC BEH C18 1.7 $\mu$ M VanGuard pre-column (2.1 $\times$ 5 mm) and ACQUITY UPLC BEH C18 1.7 $\mu$ M analytical column (2.1 $\times$ 100 mm)   |
| Column Temp. (°C)              | 40                                                                                                                                                      |
| Sample Manager Temp. (°C)      | 10                                                                                                                                                      |
| Mobile Phases                  | A=water with 0.1% formic acid; and B=acetonitrile/IPA (70:30)                                                                                           |
| Gradient Conditions            | 0-1 min (5% B), 1-11min (5%-78% B), 11-13.5 min (78%-95% B), 13.5-14 min (95%-100% B), 14-16 min (100% B), 16-16.1 min (100%-5% B), 16.1-18 min (5% B). |

|                             |                        |
|-----------------------------|------------------------|
| Flow Rate (mL/min)          | 0.40                   |
| Injection Vol. (μL)         | 5.0                    |
| MASS SPECTROMETER           |                        |
| Capillary (Kv)              | 1.5 (ESI+), 2.0 (ESI-) |
| Source Temp (°C)            | 150                    |
| Desolvation Temp (°C)       | 550                    |
| Desolvation Gas Flow (L/hr) | 1000                   |

## 2. Supplementary tables

Supplementary Table S1. Composition of the feed (per Kg)

| Gradient             | Weight | Gradient                 | Weight   | Gradient         | Weight   | Gradient  | Weight    |
|----------------------|--------|--------------------------|----------|------------------|----------|-----------|-----------|
| Crude protein        | ≥200g  | Histidine                | ≥5.5g    | Vitamink         | ≥5.0mg   | Vitaminc  | -         |
| Crude fat            | ≥40g   | Tryptophan               | ≥2.5g    | Vitaminb1        | ≥13mg    | Magnesium | ≥2.0g     |
| Crude fiber          | ≤50g   | Phenylalanine + Tyrosine | ≥13g     | Vitaminb2        | ≥12mg    | Potassium | 5.0g      |
| Crude ash            | ≤80g   | Threonine                | ≥8.8g    | Vitaminb6        | ≥12mg    | Sodium    | ≥2.0g     |
| Moisture content     | ≤100g  | Leucine                  | ≥17.6g   | Niacin           | ≥60mg    | Ferrum    | ≥120mg    |
| Calcium              | 10-18g | Isoleucine               | ≥10.3g   | Pantothenic acid | ≥24mg    | Manganese | ≥75mg     |
| Phosphorus           | 6-12g  | Valine                   | ≥11.7g   | Folate           | ≥6.0mg   | Copper    | ≥10mg     |
| Lysine               | ≥13.2g | Vitamin A                | ≥14000IU | Biotin           | ≥0.2mg   | Zinc      | ≥30mg     |
| Methionine + Cystine | ≥7.8g  | Vitamin D                | ≥1500IU  | Vitamin B12      | ≥0.022mg | Iodine    | ≥0.5mg    |
| Arginine             | ≥11g   | Vitamin E                | ≥120IU   | Choline          | ≥1250mg  | Selenium  | 0.1-0.2mg |

The composition of the feed was strictly followed the standard of GB14924-2010 in China for experimental animal feed nutrition.

Supplementary Table S2. Biochemical parameters in serum (Mean ± SD)

|                                        | Group T     | Group P     | P value |
|----------------------------------------|-------------|-------------|---------|
| Triglyceride (mmol/L)                  | 2.97±1.27   | 3.37±2.42   | 0.63    |
| Total cholesterol (mmol/L)             | 3.23±0.71   | 3.00±0.72   | 0.45    |
| High density lipoprotein, HDL (mmol/L) | 0.72±0.16   | 0.68±0.11   | 0.46    |
| Low density lipoprotein, LDL (mmol/L)  | 0.38±0.10   | 0.37±0.12   | 0.76    |
| AI                                     | 3.54±0.76   | 3.43±0.95   | 0.78    |
| K <sup>+</sup> (mmol/L)                | 10.03±1.44  | 9.71±1.34   | 0.57    |
| Na <sup>+</sup> (mmol/L)               | 135.49±1.55 | 135.84±1.36 | 0.64    |
| Ca <sup>2+</sup> (mmol/L)              | 2.74±0.15   | 2.69±0.14   | 0.33    |
| Mg <sup>2+</sup> (mmol/L)              | 1.24±0.14   | 1.21±0.09   | 0.57    |

|                                 |              |              |      |
|---------------------------------|--------------|--------------|------|
| CaAd (mmol/L)                   | 2.84±0.13    | 2.78±0.12    | 0.27 |
| Alkaline phosphatase (U/L)      | 67.31±31.04  | 72.01±30.45  | 0.77 |
| Urea (mmol/L)                   | 7.2±1.44     | 7.18±1.90    | 0.98 |
| Creatinine (μmol/L)             | 42.93±6.16   | 42.22±6.72   | 0.8  |
| Uric acid (μmol/L)              | 113.72±47.51 | 100.66±40.93 | 0.39 |
| Retinol-binding protein (mg/L)  | 3.00±0.58    | 2.80±0.63    | 0.43 |
| Alanine aminotransferase (IU/L) | 94.91±43.52  | 81.69±26.67  | 0.54 |
| Aspartate transaminase (IU/L)   | 177.7±113.78 | 185.41±99.85 | 0.89 |
| Total protein (g/L)             | 79.18±5.86   | 77.36±4.81   | 0.41 |
| Albumin (g/L)                   | 35.47±2.51   | 35.22±2.84   | 0.81 |
| Globulin (g/L)                  | 43.72±4.62   | 42.14±3.62   | 0.35 |
| Albumin/globulin                | 0.82±0.09    | 0.84±0.09    | 0.52 |
| Prealbumin (mg/L)               | 3.08±0.86    | 2.80±0.92    | 0.48 |

AI, Atherosclerotic index = (TC-HDL)/HDL; CaAd, Albumin-adjusted  $\text{Ca}^{2+}$ . P stands for purified water group, and T for tap water group. Values are mean ± SD, n = 10.

Supplementary Table S3. Biochemical parameters in urine (Mean ± SD)

|                           | Group T         | Group P        | P value |
|---------------------------|-----------------|----------------|---------|
| $\text{K}^+$ (mmol/L)     | 68.64±14.01     | 62.56±14.93    | 0.981   |
| $\text{Na}^+$ (mmol/L)    | 49.70±19.3      | 42.94±17.2     | 0.992   |
| $\text{Ca}^{2+}$ (mmol/L) | 3.14±2.04       | 3.71±1.83      | 0.448   |
| $\text{Mg}^{2+}$ (mmol/L) | 2.21±2.12       | 1.63±1.88      | 0.413   |
| UREA (mmol/L)             | 340.53±160.60   | 328.45±155.14  | 0.827   |
| CREA (μmol/L)             | 3004.83±1437.10 | 3192.87±840.62 | 1.0     |
| UA (μmol/L)               | 317.32±172.41   | 328.69±166.67  | 1.0     |
| Oxalate (mmol/L)          | 0.18±0.09       | 0.13±0.08      | 0.184   |
| Citrate (mmol/L)          | 1.09±0.22       | 1.08±0.19      | 0.923   |

P stands for purified water group, and T for tap water group.

Values are mean ± SD, n = 10.
